# Supplementary material
Source: PubMed Central journal article supplement (PMC9053276)
Supplement: 43856_2021_44_MOESM4_ESM.pdf [file 43856_2021_44_MOESM4_ESM.pdf]

## Description of Additional Supplementary Files

**File Name:** Supplementary Data 1

**Description:** Clinical Characteristics of Study Patients.

<sup>a</sup>R, right-sided; L, left-sided; B, bilateral; SNHL, sensorineural hearing loss; HL, hearing loss

<sup>b+</sup>, symptoms present

<sup>c-</sup>, symptoms absent

<sup>d</sup>Hearing loss and recovery are referenced from Fig. 1a.

**File Name:** Supplementary Data 2

**Description:** The source data for all main figures.
